1 **Pseudopaline, a staphylopine-like metallophore involved in zinc and nickel**  
2 **uptake in *Pseudomonas aeruginosa***

3  
4

5 Sébastien Lhospice<sup>1,§</sup>, Nicolas Oswaldo Gomez<sup>1,§</sup>, Laurent Ouerdane<sup>2,§</sup>, Catherine Brutesco<sup>3</sup>,  
6 Ghassan Ghssein<sup>3</sup>, Christine Hajjar<sup>3</sup>, Ahmed Liratni<sup>1</sup>, Shuanglong Wang<sup>2</sup>, Pierre Richaud<sup>4</sup>,  
7 Sophie Bleves<sup>1</sup>, Geneviève Ball<sup>1</sup>, Elise Borezée-Durant<sup>5</sup>, Ryszard Lobinski<sup>2</sup>, David Pignol<sup>3</sup>,  
8 Pascal Arnoux<sup>3,\*</sup> and Romé Voulhoux<sup>1,\*</sup>

9

10 <sup>1</sup>CNRS et Aix-Marseille Université, Laboratoire d'Ingénierie des Systèmes  
11 Macromoléculaires (UMR7255), Institut de Microbiologie de la Méditerranée, Marseille,  
12 France.

13 <sup>2</sup>Université de Pau et des Pays de l'Adour/CNRS, Laboratoire de Chimie Analytique Bio-  
14 inorganique et Environnement, IPREM-UMR5254, Hélioparc, 2, Avenue Angot, 64053 Pau,  
15 France.

16 <sup>3</sup>CEA, CNRS and Aix-Marseille Université, Institut de Biosciences et Biotechnologies d'Aix-  
17 16 Marseille, UMR 7265 LBC, CEA Cadarache, Saint-Paul-lez-Durance F-13108, France.

18 <sup>4</sup>CEA, CNRS and Aix-Marseille Université, Institut de Biosciences et Biotechnologies d'Aix-  
19 Marseille, UMR 7265 LB3M, CEA Cadarache, Saint-Paul-lez Durance F-13108, France.

20 <sup>5</sup>Micalis Institute, INRA, AgroParisTech, Université Paris-Saclay, 78350 Jouy-en-Josas,  
21 France.

22

23

24

25 <sup>§</sup>Contributed equally to this work

26 <sup>\*</sup>Correspondence E-mail: [pascal.arnoux@cea.fr](mailto:pascal.arnoux@cea.fr) and [voulhoux@imm.cnrs.fr](mailto:voulhoux@imm.cnrs.fr)

27

28 **ABSTRACT**

29 Metal uptake is vital for all living organisms. In metal scarce conditions, a common bacterial  
30 strategy consists in the biosynthesis of metallophores, their export in the extracellular medium  
31 and the recovery of a metal-metallophore complex through dedicated membrane transporters.  
32 Staphylopine is a recently described metallophore distantly related to plant nicotianamine that  
33 contributes to the broad-spectrum metal uptake capabilities of *Staphylococcus aureus*. Here,  
34 we characterize a four genes operon (*PA4837–PA4834*) in *Pseudomonas aeruginosa* involved  
35 in the biosynthesis and trafficking of a staphylopine-like metallophore named pseudopaline.  
36 Pseudopaline differs from staphylopine with regard to the stereochemistry of its histidine  
37 moiety associated to an alpha ketoglutarate moiety instead of pyruvate. *In vivo*, the  
38 pseudopaline operon is regulated by zinc through the Zur repressor. The metal-uptake  
39 property of the pseudopaline system appears different from that of staphylopine with a  
40 predominant effect on nickel uptake, and on zinc uptake in metal scarce conditions mimicking  
41 a chelating environment, thus reconciling the regulation of the *cnt* operon by zinc with its  
42 function as a zinc importer under metal scarce conditions.

43

44 **AUTHOR SUMMARY**

45 Zinc is an essential micronutrients for bacteria, particularly important at the host-pathogen  
46 interface where the host tends to sequester metals in a so called nutritional immunity  
47 framework, and the pathogenic bacterium increases its metal uptake efforts in order to keep  
48 up with its metal requirements. Here we reveal a novel metallophore, named pseudopaline,  
49 which is synthesized and exported by *Pseudomonas aeruginosa* and serves for the uptake of  
50 nickel in metal poor media, and for the uptake of zinc in metal scarce conditions that mimic  
51 the chelating environment that presumably prevails within a host.

52

## 53 INTRODUCTION

54 Divalent metals (Mn, Fe, Co, Ni, Cu and Zn) are essential micronutrients for all life forms,  
55 and acquisition of these metals is therefore vital, particularly for bacterial pathogens in the  
56 context of host-pathogen interactions. Indeed, there is a competition between the host, which  
57 tends to sequester metals in a so called nutritional immunity framework, and the pathogenic  
58 bacterium, which increases its metal uptake efforts in order to keep up with its metal  
59 requirements (1, 2). Most pathogenic bacteria produce metallophores for metal uptake, with  
60 siderophores being the most well-characterized metallophore family (3). Siderophores are  
61 synthesized within the cell through non ribosomal peptide synthases (NRPS) or through a  
62 NRPS independent system (NIS) and then are exported in the extracellular medium where  
63 they scavenge iron. Extracellular iron siderophore complexes can be recognized and actively  
64 transported into the periplasm by TonB dependent transporters (TBDT) in Gram-negative  
65 bacteria, and usually ABC transporters in both Gram-negative and Gram-positive bacteria are  
66 used for the crossing of the cytoplasmic membrane. There are many variations on this  
67 common theme and, for example, some bacteria do not produce a specific type of siderophore  
68 although they are able to use it for iron import (4). The siderophore pathway could also  
69 prevent toxic accumulation of metals, which was particularly studied in the case of  
70 *Pseudomonas aeruginosa* (5, 6). *P. aeruginosa* synthesizes two types of siderophores with  
71 high iron affinity, pyochelin and pyoverdine, the latter being a demonstrated virulence factor  
72 (7).

73 Metallophores specific for the uptake of metals other than iron have also been described, such  
74 as the chalcophore methanobactin involved in copper uptake in methane-oxidizing bacteria (8,  
75 9). Manganesophore have not been described as such, although TseM, a protein effector  
76 secreted through a Type VI secretion system, was shown to play an important role in TBDT-  
77 dependent manganese uptake in *Burkholderia thailandensis* (10). There is also indirect  
78 evidence for the existence of a nickelophore in *Escherichia coli*, although it has still to be  
79 identified (11). Free histidine could also be used as a nickelophore *in vivo* for nickel uptake in  
80 various bacteria (12, 13). Yersiniabactin, initially described as a siderophore, also exhibits  
81 zincophore properties in *Yersinia pestis* (14, 15). Coelibactin, described in *Streptomyces*  
82 *coelicolor*, may also represent a zincophore as it is synthesized by a NRPS under the control  
83 of Zur, a zinc responsive repressor (16).

84 Staphylopine is a nicotianamine-like molecule that was recently described as a metallophore  
85 with remarkable broad-spectrum specificity (17). In *Staphylococcus aureus*, staphylopine is  
86 synthesized through the action of three soluble enzymes (SaCntKLM). SaCntK transforms L-

87 histidine in D-histidine, SaCntL transfers an aminobutyrate moiety from S-  
88 adenosylmethionine (SAM) onto D-histidine, and SaCntM reductively condensates the  
89 product of SaCntL (called xNA) with pyruvate. The staphylopine biosynthesis and trafficking  
90 pathway is responsible for zinc, copper, nickel, cobalt and iron uptake, depending on the  
91 growth conditions, and this system contributes to the virulence and fitness of *S. aureus* (17–  
92 19). The *S. aureus cnt* operon is partly conserved in *P. aeruginosa*, where homologues of the  
93 *cntL* and *cntM* genes are found, albeit with 20-30% sequence identity at the protein level.  
94 Upstream of *cntL*, a gene codes a predicted outer membrane protein belonging to the TBDT  
95 family, and downstream of *cntM*, a gene codes for a predicted inner membrane protein  
96 belonging to the EamA or DMT family (drug/metabolite transporter; Figure S1).  
97 Transcriptomic approaches revealed that this gene cluster was highly expressed in a burn  
98 wound model (20). This last gene was also identified as part of a novel siderophore pathway  
99 that appeared vital for the growth of *P. aeruginosa* in airway mucus secretion (AMS) (21).  
100 Finally, through a transcriptomic study of a Zur deficient strain, these four genes were found  
101 in the top five regulated units, although most of them were annotated as hypothetical (22).  
102 Here, we show that the four above-mentioned genes (here named *cntO*, *cntL*, *cntM* and *cntI*;  
103 see supplementary table S1 for correspondence with locus tag in PAO1, PA7 and PA14  
104 strains of *P. aeruginosa*) are part of an operon that is regulated by zinc level through the Zur  
105 repressor. Using biochemistry and metabolomics approaches, we prove that the two  
106 biosynthetic enzymes (PaCntL and PaCntM) synthesize a novel metallophore, which we  
107 named pseudopaline, and which differs from staphylopine by the presence of a D-histidine  
108 moiety instead of L-histidine, and an  $\alpha$ -ketoglutarate moiety instead of a pyruvate. A *cntL*  
109 mutant strain is shown to be unable to synthesize pseudopaline and is impaired in its ability to  
110 import nickel in a minimal media, supplemented or not with nickel. Under more stringent  
111 conditions where a chelator such as EDTA is added to a minimal succinate (MS) medium, a  
112 condition that presumably mimics the chelating environment prevailing within a host or in  
113 AMS, we show evidence that the *cntL* mutant strain is unable to import zinc, therefore  
114 reconciling the regulation of this operon by zinc with its function as a zinc importer  
115 functioning in metal scarce conditions.

116

## 117 RESULTS AND DISCUSSION

### 118 The *cnt* operon of *P. aeruginosa* is regulated by zinc level through the zinc-responsive 119 regulator Zur

120 *In silico* analysis of the *cnt* gene cluster of *P. aeruginosa* PA14 strain indicated two  
121 overlapping open reading frames between *cntL* and *cntM* and between *cntM* and *cntI*,  
122 classically observed in operonic structures (Figure S1). Further screening of the upstream *cnt*  
123 sequence for promoter regions using Bprom software (23), revealed a  $\sigma 70$  promoter in the 200  
124 base-pairs upstream from the annotated *cntO* ATG codon (Figure S1). Interestingly, a putative  
125 Zur binding box “GTTATagtATAtC” can be identified overlapping the -10 box of the  
126 predicted  $\sigma 70$  promoter, (22, 24). This *in silico* analysis supports an operonic organization of  
127 the four *cnt* genes and strongly suggests a transcriptional activation of this operon under zinc  
128 depletion through the Zur repressor (25, 26). In order to test this hypothesis, we performed  
129 RT-PCR experiments using as templates RNA and cDNA generated from a WT PA14 strain  
130 grown in minimal succinate (MS) medium known to contains low levels of metals, including  
131 zinc (5). The successful amplification of the four *cnt* gene transcripts (Figure S1) indeed  
132 indicated their induction when cells were grown in a MS medium. The specific amplification  
133 of the three *cnt* intergenic regions confirmed that the four *cnt* genes are co-transcribed in one  
134 single transcript and therefore constitute an operon.

135 To validate at the protein level the transcriptional regulation of the *cnt* genes, we followed by  
136 immunoblotting the PaCntL production under various growth conditions. In this respect, we  
137 constructed a *cntL* mutant strain producing a chromosomally encoded V5-tagged PaCntL  
138 ( $\Delta cntL::cntL_{V5}$ ). In this strain, the recombinant *cntL\_{V5}* gene was placed under the predicted *cnt*  
139 promoter region and inserted at the *att* site of the *P. aeruginosa* genome. In agreement with  
140 our transcriptional data, immunoblotting experiments indicated that, the recombinant  
141 PaCntL<sub>V5</sub> is only produced in MS medium and not in a rich medium such as the LB medium  
142 (Figure 1A). Presumably, this is due to the low metal content of the MS medium as compared  
143 to the LB medium. We then tested whether the *cntL* transcription was subject to metal  
144 repression by checking PaCntL<sub>V5</sub> production in MS medium supplemented with various  
145 concentrations of the most representative metals. Dot-blot experiments showed a specific loss  
146 of PaCntL<sub>V5</sub> production in MS medium supplemented with as low as 0.1  $\mu$ M of ZnSO<sub>4</sub>. An  
147 addition of iron, nickel or cobalt at concentrations equivalent or above the one found in LB  
148 rich medium (5) has no negative effect on PaCntL<sub>V5</sub> production (Figure 1B). The hypothesis  
149 of a Zur repressor regulating the *cnt* operon was then tested through the construction of a  
150 PA14 $\Delta cntL::cntL_{V5} zur^-$  strain. PaCntL<sub>V5</sub> was still produced in the *zur* mutant strain grown in

151 LB or MS media supplemented with 1  $\mu$ M of ZnSO<sub>4</sub>, conditions in which Zur normally exerts  
152 its repressor activity (Figure 1C). Taken together, these data therefore demonstrate that the *cnt*  
153 operon of *P. aeruginosa* is negatively regulated by zinc, most probably through the binding of  
154 a Zn-Zur repressor complex onto the predicted Zur binding motif identified in the  $\sigma$ 70  
155 promoter, thus preventing the recruitment of RNA-polymerase.

156

### 157 ***In vivo* detection and characterization of a PaCntL-dependent metallophore in the** 158 **extracellular medium of *P. aeruginosa***

159 We constructed a PA14 mutant strain lacking PaCntL ( $\Delta cntL$ ) and compared the composition  
160 of the intra- and extra-cellular contents of wild type and  $\Delta cntL$  strains grown under the  
161 previously defined *cnt* inducible conditions. Extracellular samples were analysed by  
162 hydrophilic interaction liquid chromatography (HILIC) with detection by inductively coupled  
163 plasma mass spectrometry (ICP-MS) and electrospray ionization mass spectrometry (ESI-  
164 MS). HILIC/ICP-MS data revealed the presence of a molecule complexed with nickel and  
165 zinc in the supernatant of the WT strain, which was absent in the *cntL* mutant strain (Figure  
166 2). ESI-MS investigation of the metabolites eluting at this same elution volume showed  
167 unambiguously the presence of typical nickel and zinc isotopic patterns indicating the  
168 presence of a free metallophore with a molecular mass of 386 Da (Figure 2). Using the  
169 accurate mass and a molecular formula finder software we proposed the C<sub>15</sub>N<sub>4</sub>O<sub>8</sub>H<sub>20</sub> empiric  
170 formula for the ligand in complex with nickel or zinc (Figure 2, inset for the nickel chelate).  
171 This ligand corresponds to a new metallophore produced by *P. aeruginosa* in a *cntL*-  
172 dependent manner. Comparison of its elemental composition with that of staphylopine (328  
173 Da) revealed the presence of two additional carbons and two oxygen atoms, suggesting the  
174 use of an  $\alpha$ -ketoglutarate ( $\alpha$ KG) moiety instead of pyruvate as found in staphylopine. The  
175 fragmentation of this metallophore in gas-phase confirmed this hypothesis (Figure S2). We  
176 propose to name this new metallophore pseudopaline, to recall its origin from *P. aeruginosa*  
177 and its belonging to the nopaline family of opine (27).

178

### 179 ***In vitro* reconstitution of the pseudopaline biosynthetic pathway catalysed by PaCntL** 180 **and PaCntM**

181 We have recently shown that the PaCntL/M orthologs in *S. aureus* (SaCntL/M) are  
182 sequentially involved in the biosynthesis of the staphylopine metallophore, using a D-  
183 histidine that is produced by the histidine racemase enzyme SaCntK (17). One of the main  
184 difference between the *cnt* operons of *P. aeruginosa* and *S. aureus* is however the absence of

185 a *cntK* gene upstream of the *cntL-M* genes in *P. aeruginosa*. This observation led to the  
186 possibility of using directly L-histidine instead of D-histidine. In order to investigate the  
187 properties of CntL and CntM of *P. aeruginosa*, the corresponding genes were cloned,  
188 heterologously expressed in *E. coli* and their products purified for further biochemical  
189 analysis. Gel filtration experiments showed that PaCntL could form a complex with PaCntM  
190 (Figure S3), although this interaction was not observed between SaCntL and SaCntM. With  
191 regard to PaCntL, we used thin layer chromatography (TLC) separation to follow the carboxyl  
192 moiety of a carboxyl- $^{14}\text{C}$ -labelled S-adenosine methionine (SAM) substrate, co-incubated  
193 with either L- or D-histidine (Figure 3A). Only the incubation with L-histidine led to a novel  
194 band corresponding to a reaction intermediate that we propose to name yNA. We  
195 demonstrated subsequently that PaCntM preferentially bound to NADH and not to NADPH  
196 (Figure 3B), contrary to SaCntM that showed a preference for NADPH. We then used TLC to  
197 visualize the PaCntLM reaction products under various *in vitro* conditions using all the  
198 putative substrates (Figure 3C). Unexpectedly, the co-incubation of both enzymes with their  
199 most probable substrates (L-histidine, NADH and  $\alpha\text{KG}$ ) did not lead to the formation of an  
200 additional radiolabelled product as for the case of staphylopine biosynthesis (17) (Figure 3C).  
201 One possibility was therefore that the product of PaCntM was migrating at the same position  
202 as the yNA in the conditions used during the TLC separation. We therefore decided to study  
203 the same co-incubations by HILIC/ESI-MS, following the mass expected for the yNA  
204 intermediate and the pseudopaline found in the extracellular fraction of *P. aeruginosa* grown  
205 in MS medium. These experiments confirmed that the incubation of PaCntL with SAM and  
206 L-histidine led to the formation of the yNA reaction intermediate (Figure 3D, top), and most  
207 of all, revealed the production of pseudopaline when co-incubating PaCntL, PaCntM and their  
208 proposed substrates (SAM, L-histidine, NADH and  $\alpha\text{KG}$ ; Figure 3D, bottom). Co-incubations  
209 using alternative substrates of PaCntM (pyruvate or NADPH) only led to the production of  
210 yNA. Interestingly, pseudopaline and yNA eluted at the same volume in these HILIC-ESI/MS  
211 experiments, showing that their physical properties are very similar, as suggested by our  
212 previous TLC experiments.

213 Pseudopaline is therefore biosynthesized in two steps: first, a nucleophilic attack of one  $\alpha$ -  
214 aminobutyric acid moiety from SAM onto L-histidine catalysed by PaCntL to produce the  
215 reaction intermediate yNA, and second, a NADH reductive condensation of the yNA  
216 intermediate with a molecule of  $\alpha\text{KG}$  catalysed by PaCntM to produce pseudopaline (Figure  
217 3E). Pseudopaline differs from staphylopine by the stereochemistry of the histidine moiety  
218 (L- and D- respectively) and by the presence of an  $\alpha\text{KG}$  moiety instead of pyruvate in

219 staphylopine. The biosynthesis of a specific metallophore by different bacteria recalls the  
220 chemical evolution of a large diversity of siderophore in a chemical rivalry to get access to  
221 one's own pool of metal (28). Indeed, once in the extracellular medium, secreted  
222 metallophores are a common good, and a privileged access presumably gives a selective  
223 advantage.

224

### 225 **Pseudopaline is involved in nickel and zinc uptake, depending on the chelating** 226 **properties of the media**

227 In order to address the involvement of pseudopaline in metal uptake *in vivo*, we compared the  
228 intracellular concentration of various metals in PA14 WT, *ΔcntL* and *ΔcntL::cntL* strains.  
229 Cells were grown in pseudopaline-synthesis conditions determined above (MS medium) and  
230 the intracellular metal concentration was measured by ICP-MS. Under these growth  
231 conditions we observed a significant 90% reduction of intracellular nickel concentration in the  
232 *ΔcntL* mutant strain (Figure 4A), which was mostly recovered in the complemented strain.  
233 The levels of all the other metals were not changed in the *ΔcntL* mutant strain compared to the  
234 WT strain (data not shown). A similar 90% reduction in intracellular nickel concentration was  
235 also observed when the culture was supplemented with 1μM NiCl<sub>2</sub> (Figure S4), thus  
236 confirming that nickel uptake was predominantly performed by pseudopaline in these metal-  
237 poor media. We were intrigued by the apparent contradiction between the clear *cnt* operon  
238 regulation by zinc, and the absence of any effect on zinc uptake. A possible explanation is that  
239 the effect of *cnt* could be masked by the effect of a zinc ion importer such as the ZnuABC  
240 zinc transport system described in *P. aeruginosa* (22). In an attempt to discriminate between  
241 both transport systems, we sequestered free metal ions by supplementing the growth medium  
242 with increasing concentrations of EDTA, a chelating agent for divalent metals. Interestingly,  
243 although we did not observe any effect using 10 μM EDTA, the supplementation with 100μM  
244 EDTA ultimately revealed a pseudopaline-dependent zinc uptake, with a 60% decrease of  
245 intracellular zinc content in the *ΔcntL* mutant strain in comparison with the WT strain (Figure  
246 4B). The complemented strain accumulated zinc to a level comparable to the WT. In these  
247 chelating conditions the pseudopaline-dependent nickel import is abolished (Figure 4A),  
248 hence proving a direct link between pseudopaline and zinc uptake in metal scarce conditions  
249 with competing zinc chelators. These conditions may prevail at the host-pathogen interface  
250 where metal binding proteins such as calprotectin are produced by the host (29, 30), or in  
251 AMS where metals are complexed in a nutritional immunity framework (1, 21).

252



## 253 **Model of pseudopaline synthesis and transport pathway in *P. aeruginosa***

254 We next investigated the putative roles of the two membrane proteins that are found in the *cnt*  
255 operon of *P. aeruginosa* by determining the pseudopaline level in the extracellular and  
256 intracellular fractions of WT and mutant strains (Figure 5A and 5B, respectively). With  
257 regard to PaCntO, we found a small decrease in the extracellular content of pseudopaline in  
258 the  $\Delta cntO$  mutant strain in comparison with the WT strain. However, we also found that this  
259  $\Delta cntO$  mutant strain was partly impaired in nickel accumulation (Figure S5). Altogether, and  
260 because PaCntO belongs to the TBDT family of extracellular transporter, its most probable  
261 role is in the import of pseudopaline-metal complexes, although it is not excluded that other  
262 proteins of this family could participate in this process. Next, we noted a large decrease in the  
263 extracellular pseudopaline level in the  $\Delta cntI$  mutant strain in comparison with the WT strain,  
264 with a concomitant increase in the intracellular space, consistent with a role of PaCntI in  
265 pseudopaline export. It is also interesting to note that a  $\Delta cntI$  mutant strain is virtually unable  
266 to grow in AMS (21). The most probable scenario is that this mutant is deficient in metal  
267 content, including zinc, but pseudopaline accumulation in the cytoplasmic space actually  
268 worsens the situation by chelating an already poorly available metal. This assumption is  
269 supported by our finding that a double  $\Delta cntL\Delta cntI$  mutant suppresses the detrimental growth  
270 defect of the single  $\Delta cntI$  mutant strain, *ie* the absence of pseudopaline restores the normal  
271 growth of a mutant devoid of the pseudopaline exporter (Figure S6). A model recapitulating  
272 the pseudopaline pathway is shown in Figure 5.

273 It is interesting to note the differences and similarities between staphylopine and pseudopaline  
274 and between their respective biosynthetic pathways (Figure S7). On one hand, pseudopaline  
275 differs from staphylopine by the incorporation of a L-histidine instead of a D-histidine moiety  
276 in staphylopine, thus explaining the absence of amino acid racemase in *P. aeruginosa*.  
277 Another particularity of pseudopaline is the use of an  $\alpha$ KG moiety instead of pyruvate as  
278 substrate for the second reaction mediated by PaCntM. Together this leads to two species-  
279 specific metallophores that might give a selective advantage in a competing environment. The  
280 fact that staphylopine and pseudopaline belong to Gram-positive and Gram-negative bacteria  
281 has important consequences on their respective transport mechanisms across the two types of  
282 bacterial envelopes. Although the transporters of staphylopine are well identified, the outer  
283 membrane exporter pseudopaline and inner membrane importer of the pseudopaline-metal  
284 complex remains to be discovered (Figure 5). Recycling of the metallophore could also take  
285 place in *P. aeruginosa*, as recently exemplified in the case for pyoverdine (31). An interesting

286 aspect of this work is the discovery of two different pathways for the export of these  
287 nicotianamine-like bacterial metallophores. Whereas *S. aureus* uses a protein belonging to the  
288 MFS family (SaCntE) for staphylopin export, *P. aeruginosa* uses a protein belonging to the  
289 DMT family of transporters, with PaCntI possessing two predicted EamA domains for  
290 pseudopaline export. In the view of their importance in the growth or virulence of these  
291 important human pathogens (19, 21), they could emerge as attractive targets for novel  
292 antibiotic development.

293

## 294 **ACKNOWLEDGEMENTS**

295 This work was supported by the ANR-14-CE09-0007-03 grant allocated to PA, RV, RL and  
296 EBD and the grant from “Vaincre la Mucoviscidose” (RFI20160501495) allocated to RV and  
297 PA. We thank B. Douzi for fruitful discussions, B. Ize for RNA preparation and C. Soscia for  
298 technical support as well as O. Uderso, I. Bringer and A. Brun for material and media  
299 preparations.

300

## 301 **REFERENCES**

- 302 1. Hood MI, Skaar EP (2012) Nutritional immunity: transition metals at the pathogen–  
303 host interface. *Nat Rev Microbiol* 10(8):525–537.
- 304 2. Weinberg ED (1975) Nutritional Immunity: Host’s Attempt to Withhold Iron From  
305 Microbial Invaders. *JAMA* 231(1):39–41.
- 306 3. Budzikiewicz AG (2010) Siderophores from bacteria and from fungi. *Iron Uptake and*  
307 *Homeostasis in Microorganisms* (Cornelis, P. and Andrews, S. C.), pp 1–16. Caister  
308 Academic Press.
- 309 4. Cornelissen CN, Hollander A (2011) TonB-Dependent Transporters Expressed by  
310 *Neisseria gonorrhoeae*. *Front Microbiol* 2:117.
- 311 5. Cunrath O, Geoffroy VA, Schalk IJ (2016) Metallome of *Pseudomonas aeruginosa*: a  
312 role for siderophores. *Environ Microbiol* 18(10):3258–3267.
- 313 6. Schalk IJ, Hannauer M, Braud A (2011) New roles for bacterial siderophores in metal  
314 transport and tolerance. *Environ Microbiol* 13(11):2844–2854.
- 315 7. Minandri F, et al. (2016) Role of Iron Uptake Systems in *Pseudomonas aeruginosa*  
316 Virulence and Airway Infection. *Infect Immun* 84(8):2324–2335.
- 317 8. Kim HJ, et al. (2004) Methanobactin, a copper-acquisition compound from methane-  
318 oxidizing bacteria. *Science* 305(5690):1612–1615.
- 319 9. Dassama LMK, Kenney GE, Ro SY, Zielazinski EL, Rosenzweig AC (2016)

- 320 Methanobactin transport machinery. *Proc Natl Acad Sci U S A* 113(46):13027–13032.
- 321 10. Si M, et al. (2017) Manganese scavenging and oxidative stress response mediated by  
322 type VI secretion system in *Burkholderia thailandensis*. *Proc Natl Acad Sci U S A*  
323 114(11):E2233–E2242.
- 324 11. Cherrier MV, Cavazza C, Bochot C, Lemaire D, Fontecilla-Camps JC (2008)  
325 Structural characterization of a putative endogenous metal chelator in the periplasmic nickel  
326 transporter NikA. *Biochemistry (Mosc)* 47(38):9937–9943.
- 327 12. Lebrette H, et al. (2015) Novel insights into nickel import in *Staphylococcus aureus*:  
328 the positive role of free histidine and structural characterization of a new thiazolidine-type  
329 nickel chelator. *Metallomics*. doi:10.1039/C4MT00295D.
- 330 13. Shaik MM, Cendron L, Salamina M, Ruzzene M, Zanotti G (2014) *Helicobacter*  
331 *pylori* periplasmic receptor CeuE (HP1561) modulates its nickel affinity via organic  
332 metallophores. *Mol Microbiol* 91(4):724–735.
- 333 14. Bobrov AG, et al. (2014) The *Yersinia pestis* Siderophore, Yersiniabactin, and the  
334 ZnuABC system both contribute to Zinc acquisition and the development of lethal septicemic  
335 plague in mice. *Mol Microbiol*. doi:10.1111/mmi.12693.
- 336 15. Bobrov AG, et al. (2017) Zinc transporters YbtX and ZnuABC are required for the  
337 virulence of *Yersinia pestis* in bubonic and pneumonic plague in mice. *Met Integr Biometal*  
338 *Sci* 9(6):757–772.
- 339 16. Kallifidas D, et al. (2010) The zinc-responsive regulator Zur controls expression of the  
340 coelibactin gene cluster in *Streptomyces coelicolor*. *J Bacteriol* 192(2):608–611.
- 341 17. Ghsssein G, et al. (2016) Biosynthesis of a broad-spectrum nicotianamine-like  
342 metallophore in *Staphylococcus aureus*. *Science* 352(6289):1105–1109.
- 343 18. Remy L, et al. (2013) The *Staphylococcus aureus* Opp1 ABC transporter imports  
344 nickel and cobalt in zinc-depleted conditions and contributes to virulence. *Mol Microbiol*  
345 87(4):730–743.
- 346 19. Ding Y, Fu Y, Lee JC, Hooper DC (2012) *Staphylococcus aureus* NorD, a Putative  
347 Efflux Pump Coregulated with the Opp1 Oligopeptide Permease, Contributes Selectively to  
348 Fitness In Vivo. *J Bacteriol* 194(23):6586–6593.
- 349 20. Bielecki P, et al. (2011) In-vivo expression profiling of *Pseudomonas aeruginosa*  
350 infections reveals niche-specific and strain-independent transcriptional programs. *PloS One*  
351 6(9):e24235.
- 352 21. Gi M, et al. (2015) A novel siderophore system is essential for the growth of  
353 *Pseudomonas aeruginosa* in airway mucus. *Sci Rep* 5:14644.

- 354 22. Pederick VG, et al. (2015) ZnuA and zinc homeostasis in *Pseudomonas aeruginosa*.  
355 *Sci Rep* 5:13139.
- 356 23. Solovyev, V, Salamov A (2011) Automatic Annotation of Microbial Genomes and  
357 Metagenomic Sequences. *Metagenomics and Its Applications in Agriculture, Biomedicine and*  
358 *Environmental Studies* (Li, R.W.), pp 61–78. Nova Science Publishers.
- 359 24. Pawlik M-C, et al. (2012) The zinc-responsive regulon of *Neisseria meningitidis*  
360 comprises 17 genes under control of a Zur element. *J Bacteriol* 194(23):6594–6603.
- 361 25. Patzer SI, Hantke K (2000) The zinc-responsive regulator Zur and its control of the  
362 znu gene cluster encoding the ZnuABC zinc uptake system in *Escherichia coli*. *J Biol Chem*  
363 275(32):24321–24332.
- 364 26. Ellison ML, et al. (2013) The transcriptional regulator Np20 is the zinc uptake  
365 regulator in *Pseudomonas aeruginosa*. *PloS One* 8(9):e75389.
- 366 27. Thompson J, Donkersloot JA (1992) N-(carboxyalkyl)amino acids: occurrence,  
367 synthesis, and functions. *Annu Rev Biochem* 61:517–557.
- 368 28. Barber MF, Elde NC (2015) Buried treasure: evolutionary perspectives on microbial  
369 iron piracy. *Trends Genet TIG* 31(11):627–636.
- 370 29. Nakashige TG, et al. (2016) The Hexahistidine Motif of Host-Defense Protein Human  
371 Calprotectin Contributes to Zinc Withholding and Its Functional Versatility. *J Am Chem Soc*  
372 138(37):12243–12251.
- 373 30. Subramanian Vignesh K, Deepe GS (2016) Immunological orchestration of zinc  
374 homeostasis: The battle between host mechanisms and pathogen defenses. *Arch Biochem*  
375 *Biophys* 611:66–78.
- 376 31. Ganne G, et al. (2017) Iron Release from the Siderophore Pyoverdine in *Pseudomonas*  
377 *aeruginosa* Involves Three New Actors: FpvC, FpvG, and FpvH. *ACS Chem Biol*  
378 12(4):1056–1065.
- 379  
380  
381

382 **FIGURES AND FIGURE LEGENDS**

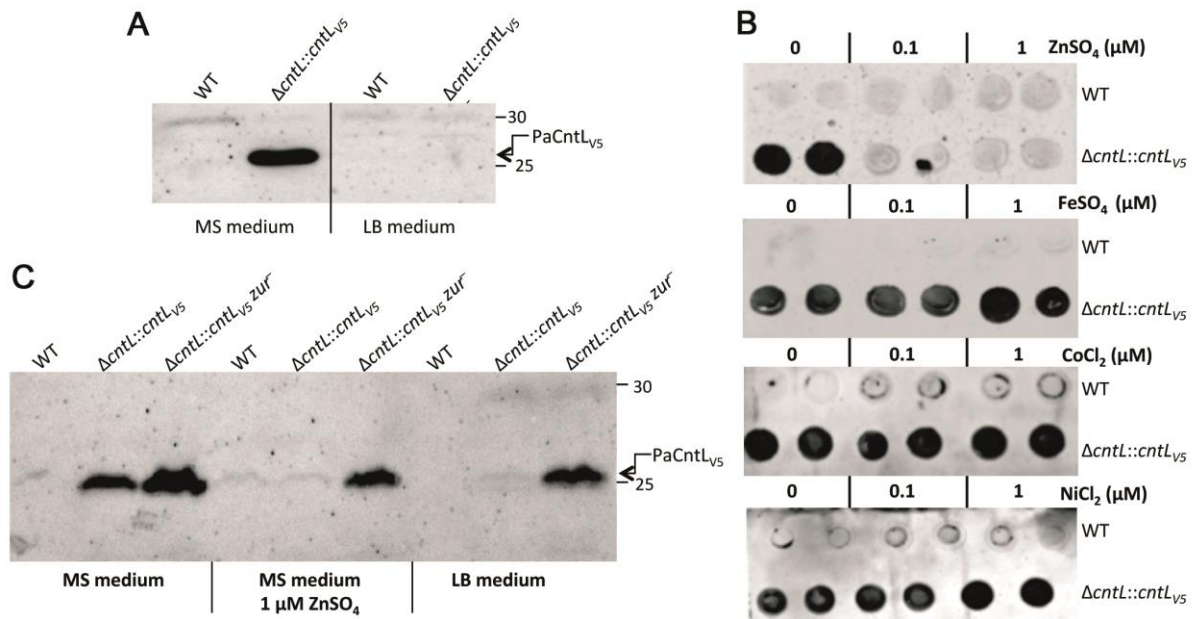

383

384 Figure 1: PaCntL production under various growth conditions. (A) Immunoblotting using  
385 antibody directed against the V5 epitope for revealing PaCntL<sub>V5</sub> production under poor (MS)  
386 and rich (LB) media. (B) Dot-blot revealing the Pa-CntL<sub>V5</sub> production in MS medium  
387 supplemented by divalent metals. (C) Immunoblot detection of PaCntL<sub>V5</sub> production in PA14  
388 WT and Zur deficient strains (*zur*<sup>-</sup>) in various growth conditions.

389

390

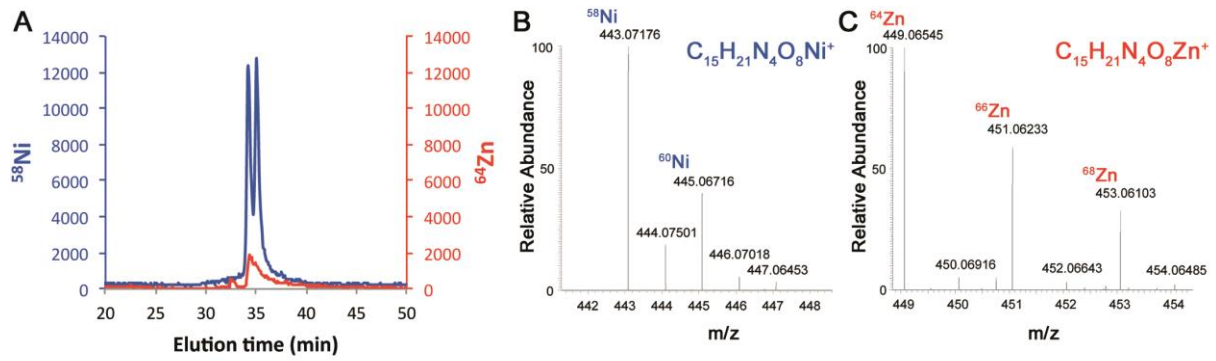

391

392 Figure 2: *In vivo* PaCntL-dependent detection of a nickel or zinc-bound metallophore in the  
393 extracellular fraction of *P. aeuginosa*. (A) HILIC/ICP-MS chromatogram of metal-bound  
394 metabolites. (B) HILIC-ESI/MS mass spectrum of a Ni-metallophore complex in the  
395 extracellular fraction of the WT strain but absent in the  $\Delta cntL$  mutant. (C) HILIC-ESI/MS  
396 mass spectrum of a Zn-metallophore complex in the extracellular fraction of the WT strain but  
397 absent in the  $\Delta cntL$  mutant. The empirical molecular formula of the CntL-dependant Ni- or  
398 Zn-metallophore complexes were deduced from the exact masse.

399

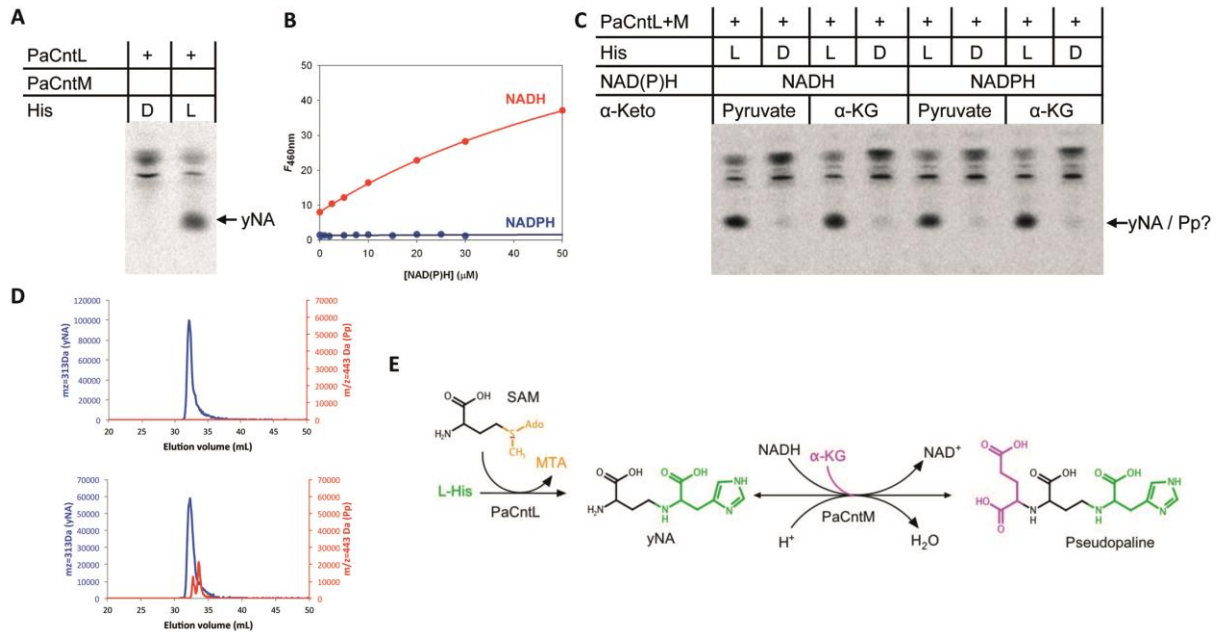

400  
 401 Figure 3: *In vitro* reconstitution of the pseudopaline biosynthesis pathway. (A) TLC  
 402 experiment using PaCntL and [<sup>14</sup>C]-SAM showing that PaCntL discriminates between D- and  
 403 L-histidine substrate with the production of the reaction intermediate (noted yNA) only  
 404 visible when using L-histidine. (B) Titration of NADPH (blue) and NADH (red) binding to  
 405 PaCntM (5 $\mu$ M) followed by fluorescence resonance energy transfer. Fitting of the data  
 406 obtained for NADH led to a  $K_d$  of 30 $\mu$ M. (C) TLC separation of reaction products incubating  
 407 [<sup>14</sup>C]-SAM using purified enzymes (PaCntL and PaCntM), different source of  $\alpha$ -ketoacid  
 408 (pyruvate or  $\alpha$ -KG), cofactor (NADH or NADPH) and histidine (L-His or D-His). (D)  
 409 HILIC/ESI-MS chromatograms of putative reaction products using PaCntL incubated with L-  
 410 histidine, revealing the production of the yNA intermediate (top), and a mix of PaCntL and  
 411 PaCntM incubated with all their putative substrate (SAM, L-histidine, NADH and  $\alpha$ -  
 412 Ketaoglutarate), revealing the specific detection of pseudopaline in this case (red trace,  
 413 bottom). (E) Summary of the PaCntL/M-dependent biosynthesis pathway for the assembly of  
 414 pseudopaline from L-his, SAM, NADH and  $\alpha$ -KG.  
 415

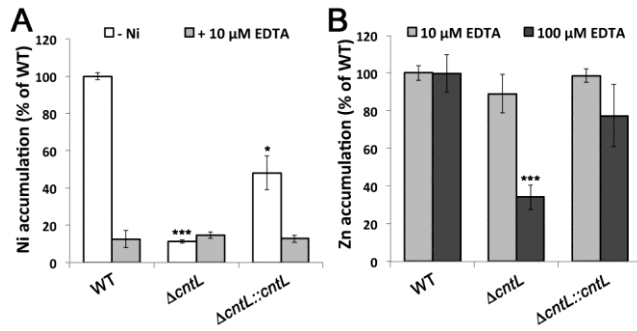

416

417 Figure 4: Pseudopaline is involved in nickel uptake in minimal media and in zinc uptake in  
418 chelating media. Intracellular nickel (A) or zinc (B) levels measured by ICP-MS in WT,  $\Delta cntL$   
419 and  $\Delta cntL::cntL$  strains grown in MS medium supplemented or not with 10 or 100 $\mu$ M EDTA.  
420 Error bars, mean  $\pm$  s.d. \* $P$ <0.05, \*\* $P$ <0.01 and \*\*\* $P$ <0.001 as compared to the WT.

421

422



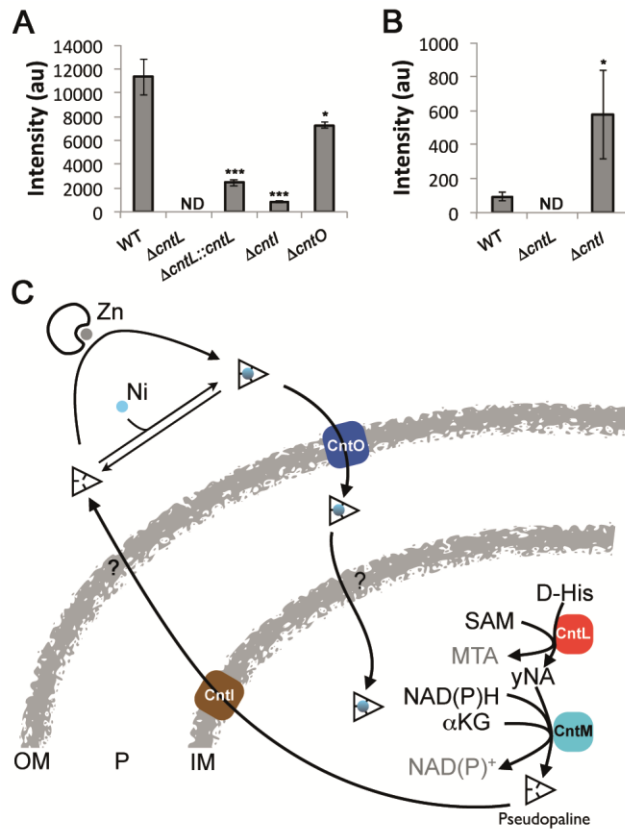

423

424 Figure 5: Model of pseudopaline synthesis, secretion and metal uptake in *P. aeruginosa*. (A)

425 Extracellular detection of pseudopaline in the extracellular fraction of WT and mutant strains.

426 Error bars, mean  $\pm$  s.d. \* $P$ <0.05, \*\* $P$ <0.01 and \*\*\* $P$ <0.001 as compared to the WT. (B)

427 Intracellular detection of pseudopaline in the intracellular fraction of WT and mutant strains.

428 ND: Not Detectable. (C) Model of pseudopaline production, secretion and recovery of nickel

429 or zinc. Outer membrane (OM), inner membrane (IM), periplasm (P).

430

431
